# Supplementary material
Source: PubMed Central journal article supplement (PMC10330100)
Supplement: NIHMS1888600-supplement-supinfo2.pdf [file NIHMS1888600-supplement-supinfo2.pdf]

# **KMT2D Links TGF- $\beta$ Signalling to Non-Canonical Activin Pathway and Regulates Pancreatic Cancer Cell Plasticity**

Shuang Lu<sup>1,2#</sup>, Hong Sun Kim<sup>1#</sup>, Yubo Cao<sup>1#</sup>, Karan Bedi<sup>3</sup>, Lili Zhao<sup>4</sup>, Ishwarya Venkata Narayanan<sup>3</sup>, Brian Magnuson<sup>4</sup>, Yumei Gu<sup>1</sup>, Jing Yang<sup>1</sup>, Zhujun Yi<sup>1</sup>, Sepideh Babaniamansour<sup>1</sup>, Sargis Shameon<sup>1</sup>, Chang Xu<sup>1</sup>, Michelle T. Paulsen<sup>3</sup>, Ping Qiu<sup>5</sup>, Sivakumar Jeyarajan<sup>1</sup>, Mats Ljungman<sup>3</sup>, Dafydd Thomas<sup>1</sup>, Yali Dou<sup>6</sup>, Howard Crawford<sup>7</sup>, Marina Pasca di Magliano<sup>8</sup>, Kai Ge<sup>9</sup>, Bo Yang<sup>5</sup>, Jiaqi Shi<sup>1\*</sup>

## Supplementary Information

### Supplementary Materials and Methods

Supplementary Table 1

Supplementary Table 2

Supplementary Table 3

Supplementary Table 4

Supplementary Table 5

Supplementary Table 6 (available in a separate excel file)

Supplementary Figure 1

Supplementary Figure 2

Supplementary Figure 3

Supplementary Figure 4

Supplementary Figure 5

Supplementary Figure 6

Supplementary References

## Supplementary Materials and Methods

### Bru-seq and BruChase-seq

Bru-seq and BruChase-seq were performed as previously described<sup>1</sup>. Briefly, cells were incubated in media containing bromouridine (Bru) (Sigma-Aldrich) at a final concentration of 2 mM for 30 minutes at 37°C to label nascent RNA. Cells were then lysed directly in Trizol, and total RNA was isolated. Bru-labeled RNA was immunocaptured using anti-BrdU antibodies, followed by the preparation of strand-specific cDNA libraries with the Illumina TruSeq kit (Illumina). The quality and concentration of the libraries were determined using an Agilent Bioanalyzer. Deep sequencing was performed at the University of Michigan Advanced Genomics Core using the Illumina HiSeq 2000 sequencer (51 bp read length, single-end sequencing) as previously described<sup>1-3</sup>. For BruChase-seq, cells were first labeled with 2 mM Bru for 30 minutes, washed in PBS, and then incubated in conditioned media containing 20 mM uridine for 6 hours. The cells were then lysed in Trizol, and Bru-labeled RNA was captured and processed as described above. Reads were pre-mapped (hence called premap fraction) to the ribosomal RNA (rRNA) repeating unit (GenBank U13369.1) and the mitochondrial and EBV genomes (from the hg38 analysis set) using Bowtie2 (2.3.3)<sup>4</sup>. Unaligned reads were subsequently mapped to human genome (hence called genome fraction) build hg38/GRCh38 using STAR (v 2.5.3a)<sup>5</sup> and a STAR index created from GENCODE annotation version 27 ([ftp://ftp.ebi.ac.uk/pub/databases/gencode/Gencode\\_human/release27/gencode.v27.basic.annotation.gtf.gz](ftp://ftp.ebi.ac.uk/pub/databases/gencode/Gencode_human/release27/gencode.v27.basic.annotation.gtf.gz))<sup>6</sup>. The relative level of nascent RNA labeling was presented as RPKM values from Bru-seq data. Relative RNA stability is expressed as the ratio of BruChase-seq at 6-hour/ Bru-seq at 0-hour RPKM values. Synthesis was filtered for genes >300 bp and stability was filtered for 0-hour RPKM value>0.5 to ensure reliable numerical evaluations. The sequencing coverage and quality statistics for each sample are summarized in Supplementary Table 3.

### Supplementary Table 1. miRNA and siRNA information

|                      |                       |
|----------------------|-----------------------|
| Hsp-miR-147b         | GUGUGCGGAAAUGCUUCUGCU |
| KMT2D scramble siRNA | UGGUUUACAUGUCGACUAA   |
| KMT2D siRNA1         | GAAAGAAGCUGCGGAAGGA   |
| KMT2D siRNA2         | GCAGAUACCUUGUUUAGCA   |
| KMT2D crRNA1         | AGTGTGCCAAGCCTGCAGGT  |
| KMT2D crRNA2         | AGTGGCGGCACTGGATTAGT  |
| ctrl siRNA           | UGGUUUACAUGUCGACUAA   |
| INHBA siRNA          | GAACGGGUAUGUGGAGAU    |

## Supplementary Table 2. Information on antibodies and reagents

|                |                                                                        |
|----------------|------------------------------------------------------------------------|
| TGF- $\beta$ 1 | Cell Signaling (#8915LC, 20ng/ml)                                      |
| activin A      | PEPROTECH (#120-14P, 10ng/ml)                                          |
| folliculin     | PEPROTECH (#120-13, 100ng/ml with activin A, 40ng/ml when using alone) |
| SB505124       | Sigma-Aldrich (#S4696, 2.5uM)                                          |
| SB202190       | EMD Millipore (#559388, 5 or 10uM)                                     |
| E-cadherin     | Cell Signaling (#3195, 1/1000)                                         |
| MMP2           | Cell Signaling (#40994, 1/1000)                                        |
| SNAIL          | Cell Signaling (#3879, 1/1000)                                         |
| GAPDH          | Cell Signaling (#5174, 1/1000)                                         |
| $\beta$ -actin | Sigma-Aldrich (#A5441, 1/2500)                                         |
| Vimentin       | Santa Cruz (#SC66002, 1/500)                                           |
| H3K4me1        | Cell Signaling (#5326s, 1/1000)                                        |
| H3K4me2        | EMD Millipore (#17677, 1/1000)                                         |
| H3K4me3        | Cell Signaling (#9751s, 1/1000)                                        |
| H3             | Cell Signaling (#4499, 1/1000)                                         |
| KMT2D          | EMD Millipore (#ABE1867, 1/1000)                                       |
| p38            | Cell Signaling (#8690, 1/1000)                                         |
| p-p38          | Cell Signaling (#4511, 1/1000)                                         |
| ERK            | Cell Signaling (#4691, 1/1000)                                         |
| p-ERK          | Cell Signaling (#2965, 1/1000)                                         |
| Akt            | Cell Signaling (#4691, 1/1000)                                         |
| p-Akt          | Cell Signaling (#2965, 1/1000)                                         |
| JNK1           | Cell Signaling (#3708, 1/1000)                                         |
| p-SAPK/JNK     | Cell Signaling (#4668, 1/1000)                                         |
| SMAD2          | Cell Signaling (#3103, 1/1000)                                         |
| p-SMAD2        | Cell Signaling (#3108s, 1/500)                                         |
| SMAD3          | Cell Signaling (#9523s, 1/1000)                                        |
| p-SMAD3        | Cell Signaling (#9520s, 1/500)                                         |

**Supplementary Table 3. Summary of sequencing coverage and quality statistics**

| Sample ID               | Total number of sequenced reads | Total number of uniquely mapped reads <sup>a</sup> | RNA integrity number (RIN)* | Ratio of all reads aligned to rRNA regions to total uniquely mapped reads (rRNA rate)** | Ratio of exon-mapped reads to total uniquely mapped reads (Expression Profile Efficiency) | Total number of detected transcripts with reads $\geq 1^b$ |
|-------------------------|---------------------------------|----------------------------------------------------|-----------------------------|-----------------------------------------------------------------------------------------|-------------------------------------------------------------------------------------------|------------------------------------------------------------|
| KO1                     | 71,191,915                      | 57,483,106                                         | N/A                         | 0.079679704                                                                             | 0.135513712                                                                               | 6609                                                       |
| KO2                     | 62,404,368                      | 47,555,769                                         | N/A                         | 0.128660499                                                                             | 0.128217138                                                                               | 7547                                                       |
| WT                      | 47,160,143                      | 33,572,271                                         | N/A                         | 0.197165287                                                                             | 0.141446954                                                                               | 7697                                                       |
| Control/TGFb 0h         | 77,819,433                      | 60,543,908                                         | N/A                         | 0.027509741                                                                             | 0.1104291                                                                                 | 6228                                                       |
| Control (BruChase-seq)  | 92,669,081                      | 44,061,771                                         | N/A                         | 0.063216787                                                                             | 0.520406336                                                                               | 6120                                                       |
| TGFb 1h                 | 62,761,061                      | 49,038,731                                         | N/A                         | 0.043510299                                                                             | 0.109346756                                                                               | 5806                                                       |
| TGFb 24h                | 74,032,398                      | 58,047,522                                         | N/A                         | 0.023900055                                                                             | 0.110775045                                                                               | 5651                                                       |
| TGFb 72h                | 59,252,840                      | 44,777,907                                         | N/A                         | 0.092399716                                                                             | 0.114080073                                                                               | 5735                                                       |
| 72h TGFb (BruChase-seq) | 41,714,886                      | 25,847,419                                         | N/A                         | 0.042244402                                                                             | 0.496663578                                                                               | 5377                                                       |

<sup>a</sup> GRCh38 reference genome was used.

<sup>b</sup> A higher minimum coverage threshold is permitted. We calculate RPKM values, instead of TPM values. In our case, these numbers represent the number of genes that meet a threshold of  $\geq 1$  RPKM and gene length  $\geq 300$  bp.

\*We don't analyze our total RNA (and therefore get RIN values) since we pull out the Bru-RNA from the total RNA and use that for library prep

\*\* Total uniquely mapped reads = Uniquely mapped reads to premap fraction + uniquely mapped reads to genome fraction

#### Supplementary Table 4. Primer sequences

|          |                                                                                   |
|----------|-----------------------------------------------------------------------------------|
| CDH1     | forward 5'-GGCCTGAAGTGAAGTACTCGTAACG-3'<br>reverse 5'-CAGTATCAGCCGCTTTTCAGATTT-3' |
| MMP2     | forward 5'-TTGATGGCATCGCTCAGATC-3'<br>reverse 5'-TTGTCACGTGGCGTCACAGT-3'          |
| SNAIL    | forward 5'-CAGACCCACTCAGATGTCAA<br>reverse 5'-CATAGTTAGTCACACCTCGT-3'             |
| Vimentin | forward 5'-CCTTGAACGCAAAGTGGGAATC-3'<br>reverse 5'-GACATGCTGTTCCCTGAATCTGAG-3'    |
| KMT2D    | forward 5'-GTCTTCACTGACGCCTCTCC-3'<br>reverse 5'-GCTCCTCGCCCTTCAGATAC-3'          |
| GAPDH    | forward 5'-ACCCAGAAGACTGTGGAT-3'<br>reverse 5'-GAGGCAGGGATGATGTTC-3'              |
| INHBA    | forward 5'-GTGAGTGCCCCGAGCCATATAG-3'<br>reverse 5'-CATGCGGTAGTGGTTGATGACT-3'      |

**Supplementary Table 5. Protein expression levels of KMT2D in PDAC and its precursors**

| <b>Category</b>     | <b>N=</b>  | <b>Mean ± SD</b> | <b>p-value</b>         |
|---------------------|------------|------------------|------------------------|
| Normal/Pancreatitis | 35         | 192±46           |                        |
| PanIN               | 30         | 194±45           |                        |
| MCN                 | 13         | 189±44           |                        |
| IPMN                | 38         | 214±53           |                        |
| PDAC                | 78         | 164±42           | 0.0000002 (vs. benign) |
| MET PDAC            | 19         | 147±37           | 0.0004 (vs. others)    |
| <b>Total</b>        | <b>213</b> |                  |                        |

PanIN: Pancreatic intraepithelial neoplasia; IPMN: Intraductal papillary mucinous neoplasm; MCN: Mucinous cystic neoplasm; PDAC: Pancreatic ductal adenocarcinoma; MET PDAC: metastatic PDAC; SD: Standard deviation; vs.: versus.

**Supplementary Table 6. Genes upregulated >2 log<sub>2</sub>FC in KMT2D knockout BxPC3 cells (two clones, KO1 and KO2) compared to control**

See attached excel file.



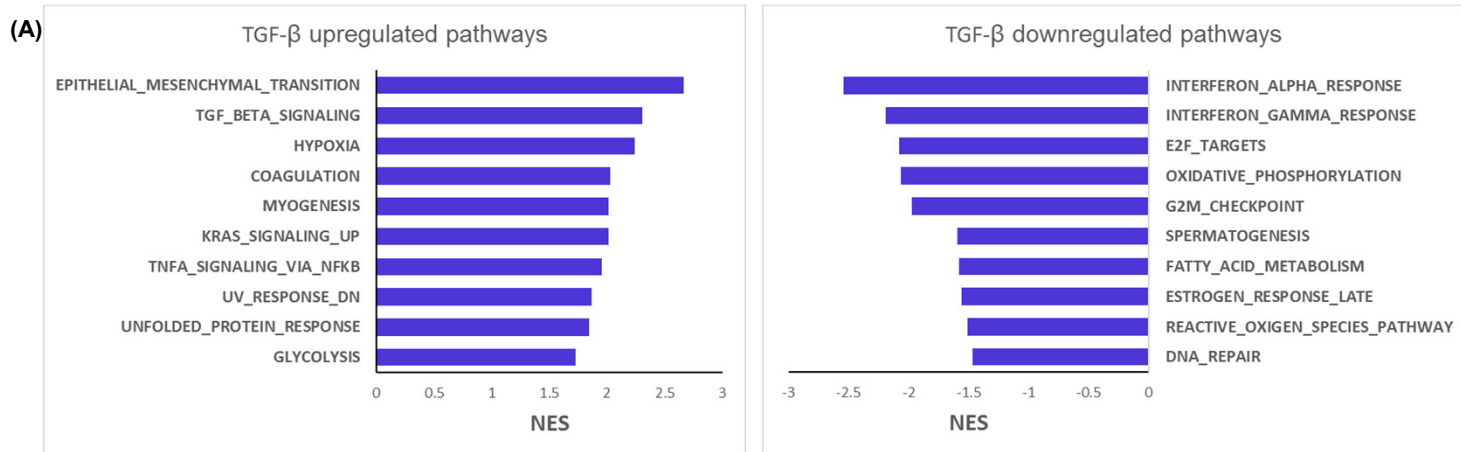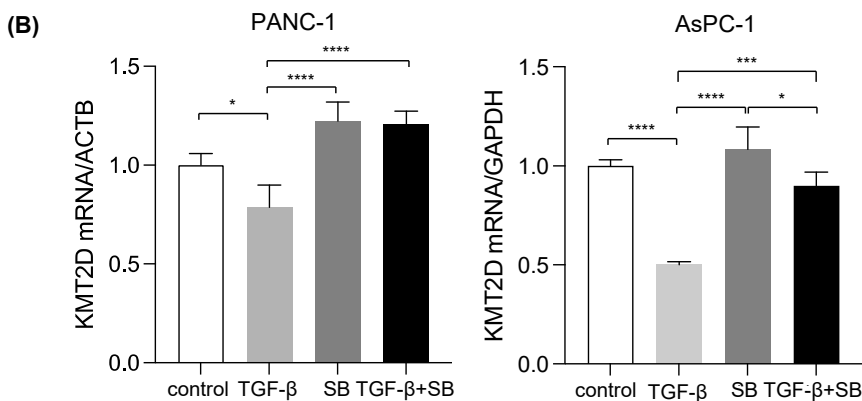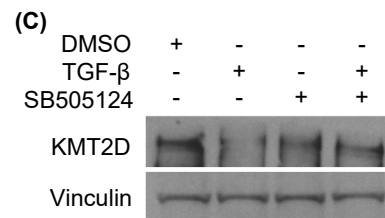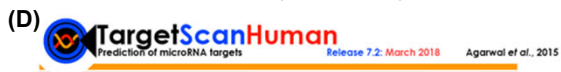

Human KMT2D (ENST00000301067.7) 3' UTR miRNA Table

Table sorted by cumulative weighted context++ score [Sort table by aggregate P<sub>C</sub>] [Download table]

miRNA families broadly conserved among vertebrates

| miRNA family                         | Conserved sites |      |         | Poorly conserved sites |      |         | Conserved sites | Cumulative weighted context++ score | Total context++ score | Aggregate P<sub>C</sub> |
|--------------------------------------|-----------------|------|---------|------------------------|------|---------|-----------------|-------------------------------------|-----------------------|-------------------------|
|                                      | Total           | 5mer | 7mer AT | Total                  | 5mer | 7mer AT |                 |                                     |                       |                         |
| miR-210-3p                           | 1               | 1    | 0       | 0                      | 0    | 0       | 1               | -0.36                               | -0.37                 | 0.17                    |
| miR-34-5p/145-5p                     | 1               | 0    | 1       | 0                      | 0    | 0       | 1               | -0.26                               | -0.26                 | 0.97                    |
| miR-15-5p/15-5p/155-5p/424-5p/497-5p | 1               | 0    | 1       | 0                      | 0    | 1       | 2               | -0.18                               | -0.19                 | 0.79                    |
| miR-147b                             | 1               | 0    | 1       | 0                      | 0    | 0       | 1               | -0.18                               | -0.19                 | 0.81                    |
| miR-305-3p                           | 1               | 0    | 1       | 0                      | 0    | 0       | 0               | -0.15                               | -0.15                 | 0.36                    |
| miR-215-5p                           | 1               | 0    | 1       | 0                      | 0    | 1       | 0               | -0.15                               | -0.15                 | 0.66                    |
| let-7-5p/90-5p                       | 1               | 1    | 0       | 0                      | 0    | 0       | 0               | -0.14                               | -0.14                 | 0.96                    |
| miR-193a-5p                          | 1               | 0    | 1       | 0                      | 0    | 0       | 2               | -0.12                               | -0.12                 | 0.81                    |
| miR-143-3p                           | 1               | 0    | 1       | 0                      | 0    | 0       | 1               | -0.03                               | -0.03                 | 0.26                    |
| miR-142-5p                           | 1               | 0    | 1       | 0                      | 0    | 0       | 0               | -0.02                               | -0.02                 | 0.36                    |
| miR-103-3p/107                       | 1               | 0    | 1       | 0                      | 0    | 0       | 3               | -0.02                               | -0.02                 | 0.42                    |
| miR-204-5p/211-5p                    | 1               | 0    | 1       | 0                      | 0    | 0       | 0               | -0.02                               | -0.02                 | 0.19                    |
| miR-23-3p                            | 1               | 0    | 1       | 0                      | 0    | 0       | 0               | -0.02                               | -0.02                 | 0.26                    |
| miR-146-5p                           | 1               | 0    | 1       | 0                      | 0    | 0       | 0               | -0.02                               | -0.02                 | 0.81                    |
| miR-217                              | 1               | 0    | 1       | 0                      | 0    | 0       | 1               | -0.02                               | -0.02                 | 0.21                    |
| miR-1305-5p                          | 1               | 0    | 1       | 0                      | 0    | 0       | 0               | -0.01                               | -0.01                 | 0.81                    |
| miR-30-5p                            | 1               | 0    | 1       | 0                      | 0    | 0       | 0               | -0.01                               | -0.01                 | 0.78                    |

**(E)**

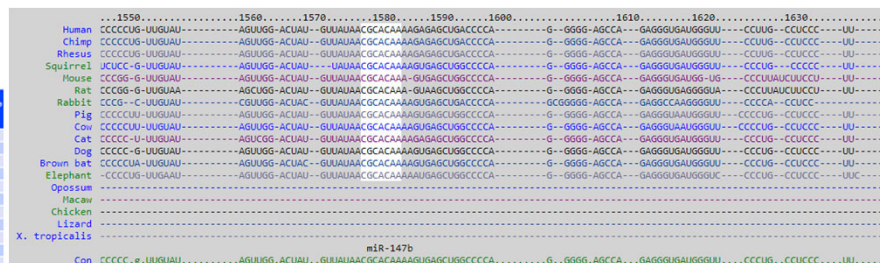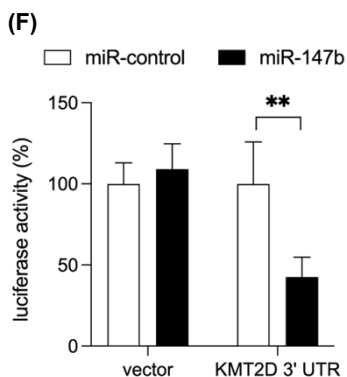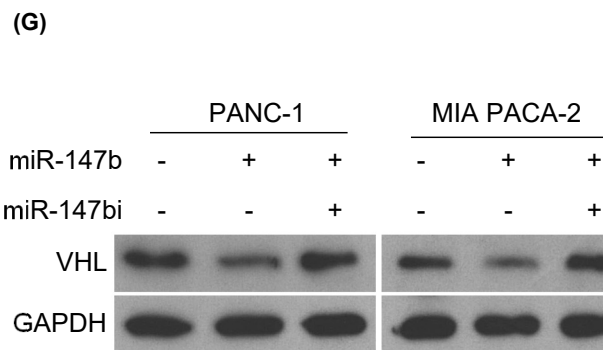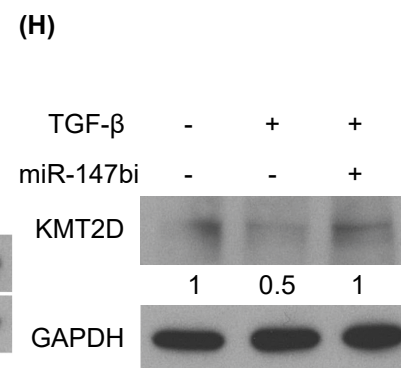

**Supplementary Fig. 1** TGF- $\beta$  downregulates KMT2D via miR-147b in PDAC cells. **(A)** Top hallmark pathways that are up- or down-regulated in TGF- $\beta$  treated PANC-1 cells. NES: normalized enrichment score. **(B)** mRNA expression of KMT2D in PANC-1 and AsPC-1 cells treated with TGF- $\beta$  with or without its inhibitor SB505124. **(C)** Western blot of MIA PaCa-2 cells treated with 20 ng/ml TGF- $\beta$  with or without 2.5 nM SB505124 or DMSO for 48h.  $\beta$ -actin was used as loading control. **(D)** TargetScan prediction of potential miRNAs targeting 3' UTR of KMT2D. **(E)** Conserved site in miR-147b among mammals queried from TargetScanHuman. **(F)** Dual-luciferase reporter assay with negative control (miR-control) or miR-147b mimic in the presence or absence of predicted targeted KMT2D 3' UTR sequence. **(G)** Western blot of VHL after miR-147b mimic with or without miR-147bi transfection in two PDAC cell lines. **(H)** Western blot of KMT2D in the presence of TGF- $\beta$  or TGF- $\beta$  + miR-147bi. GAPDH was used as loading control. \*\*p < 0.01, \*\*\*\*p < 0.001, One-way ANOVA test with Dunnett's multiple comparisons test (n=3).

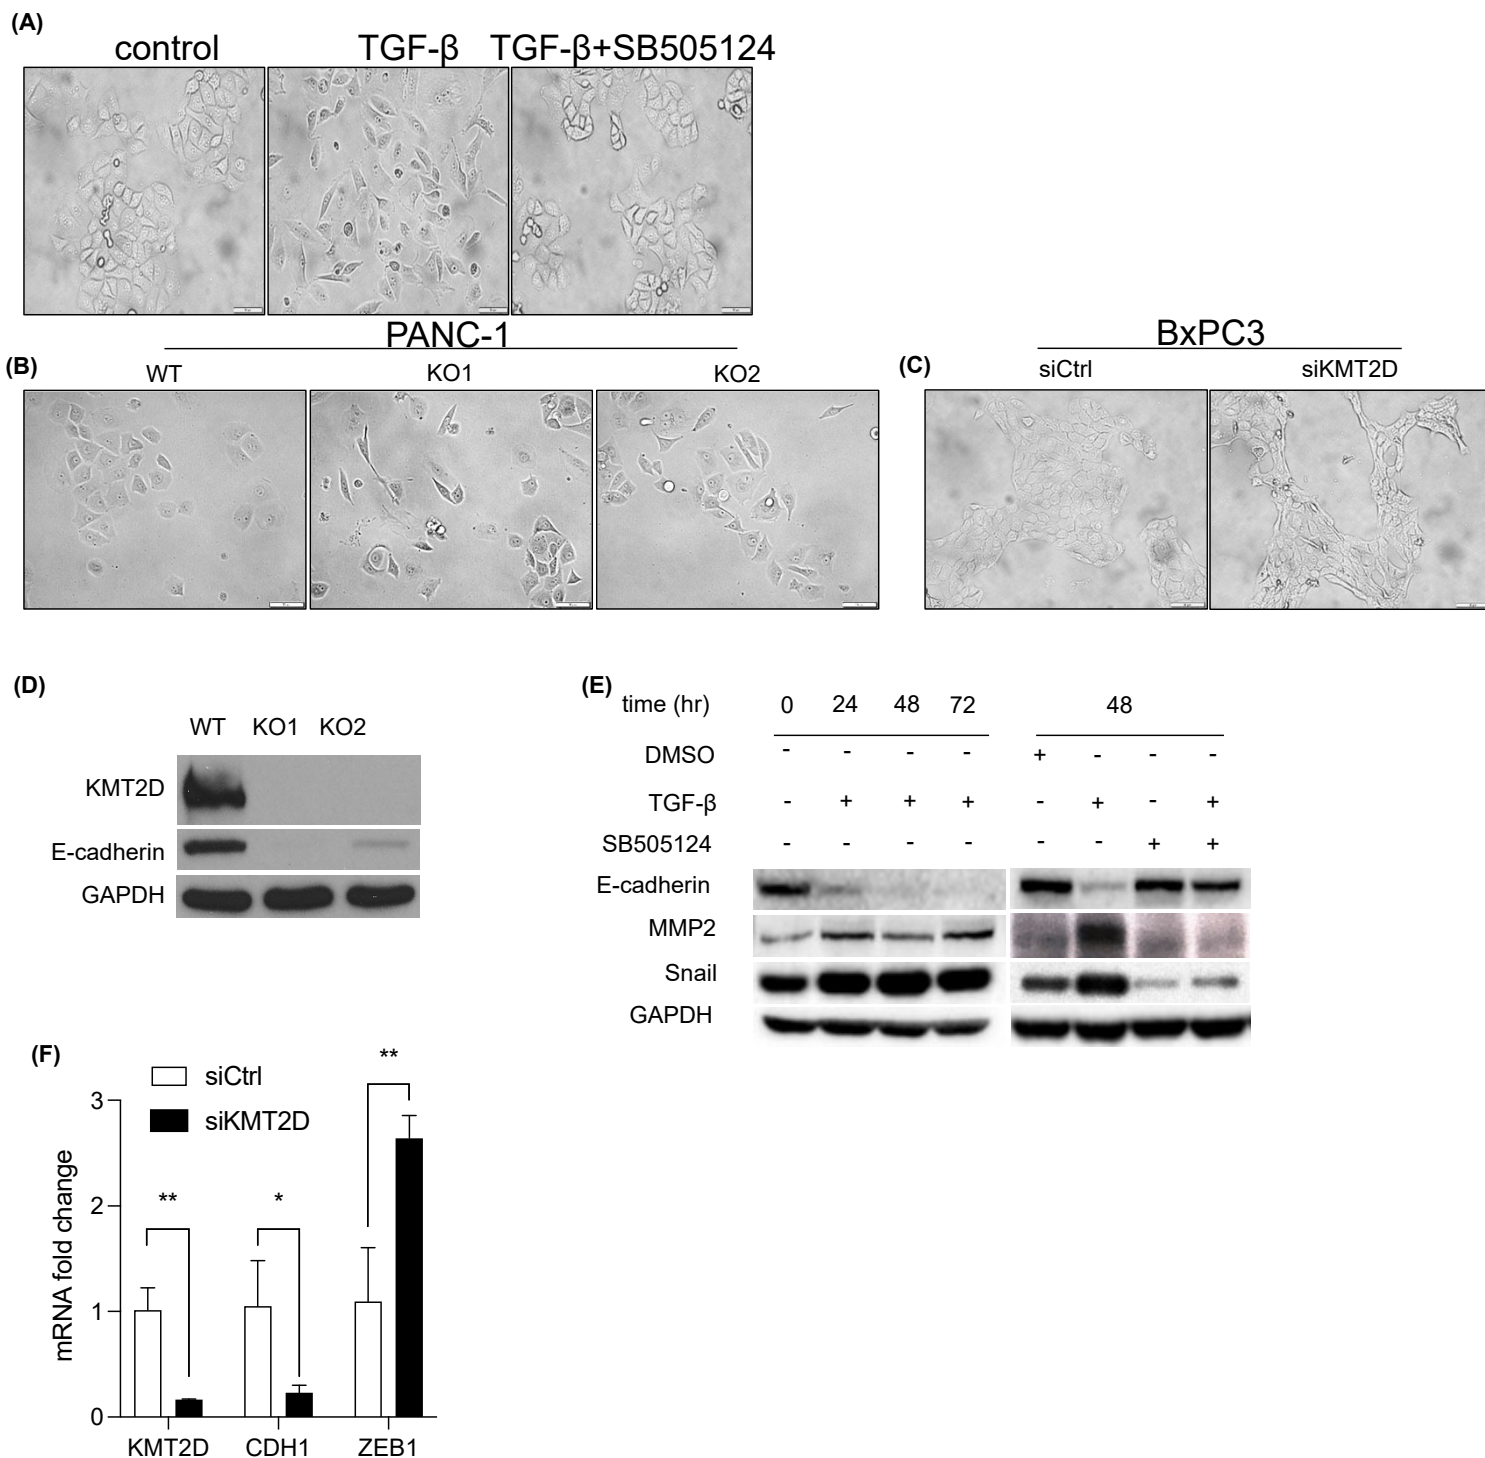

**Supplementary Fig. 2** Loss of KMT2D induces EMT in PDAC cells. **(A)** Phase-contrast images of PANC-1 cells treated with DMSO, or TGF- $\beta$  with or without SB505124. (scale bar = 100  $\mu$ m). **(B)** Phase-contrast images of PANC-1 wild-type (WT) cells and KMT2D knockout (KO) cells. Scale bar: 100  $\mu$ m. **(C)** Phase-contrast images of BxPC-3 cells transfected with 50 nM scrambled siRNA (siCtrl) or KMT2D siRNA (siKMT2D) for 5 days. **(D)** Western blot analysis of KMT2D and E-cadherin in WT and KMT2D-KO PANC-1 cells. GAPDH was used as loading control. **(E)** Western blot analysis of E-cadherin, MMP2, and Snail in PANC-1 cells treated with DMSO or 20 ng/ml TGF- $\beta$  with or without SB505124 for 24, 48, and 72 hours. GAPDH was used as loading control. **(F)** Real-time RT-PCR of KMT2D, CDH1, and ZEB1 in control and KMT2D siRNA knockdown HPDE cells (\* $p$ <0.05, \*\* $p$ <0.01, multiple unpaired student t test,  $n$ =3)

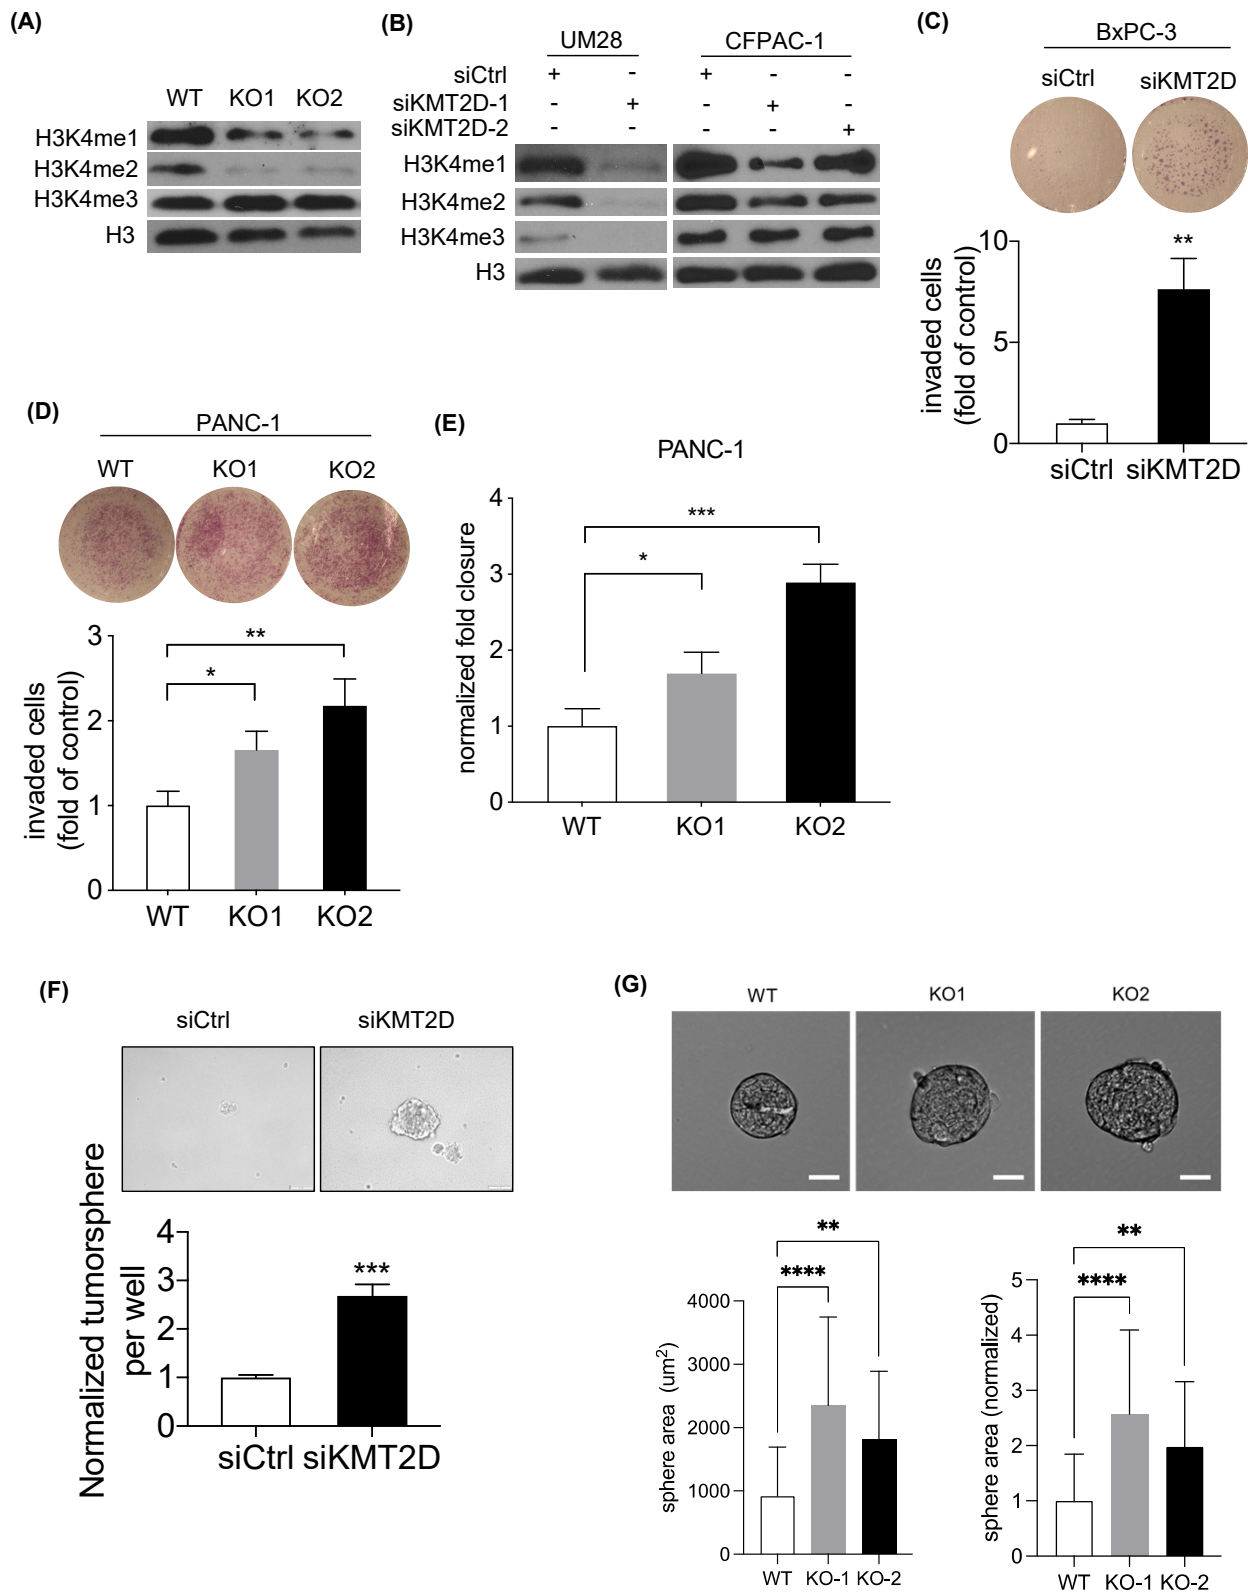

**Supplementary Fig. 3** Reduced KMT2D expression decreases global H3K4 mono- and di-methylation and promotes cell migration, invasion, and tumorigenicity in PDAC cells. **(A)** Western blot of histone H3 lysine4 methylation levels in WT and KMT2D-KO BxPC-3 cells. H3 was used as loading control. **(B)** Western blot analysis of histone H3 lysine4 methylation levels in siCtrl or siKMT2D transfected UM28 or CFPAC-1 PDAC cell lines. H3 was used as loading control. **(C)** Invaded BxPC-3 cells transfected with either siCtrl or siKMT2D at 48h by transwell invasion assay (\*\* $p < 0.01$ , unpaired student t test,  $n = 3$ ). **(D)** Invaded cells in 2 KMT2D-KO PANC-1 clones and WT PANC-1 cells at 48 h by transwell invasion assay. (\* $p < 0.05$ , \*\* $p < 0.01$ , one-way ANOVA with Dunnett's multiple comparisons test,  $n = 3$ ) **(E)** Wound closure in KMT2D-KO and WT PANC-1 cells at 48h post scratch by wound healing assay. **(F)** Tumor spheres formed by siCtrl or siKMT2D transfected UM28 cells by tumor sphere formation assay. **(G)** Tumor sphere size formed by control or KMT2D-knockout BxPC-3 cells by tumor sphere formation assay. Scale bar=25  $\mu\text{m}$ . \*\* $p < 0.01$ , \*\*\* $p < 0.005$ , \*\*\*\* $p < 0.001$ , unpaired student t test,  $n = 3$

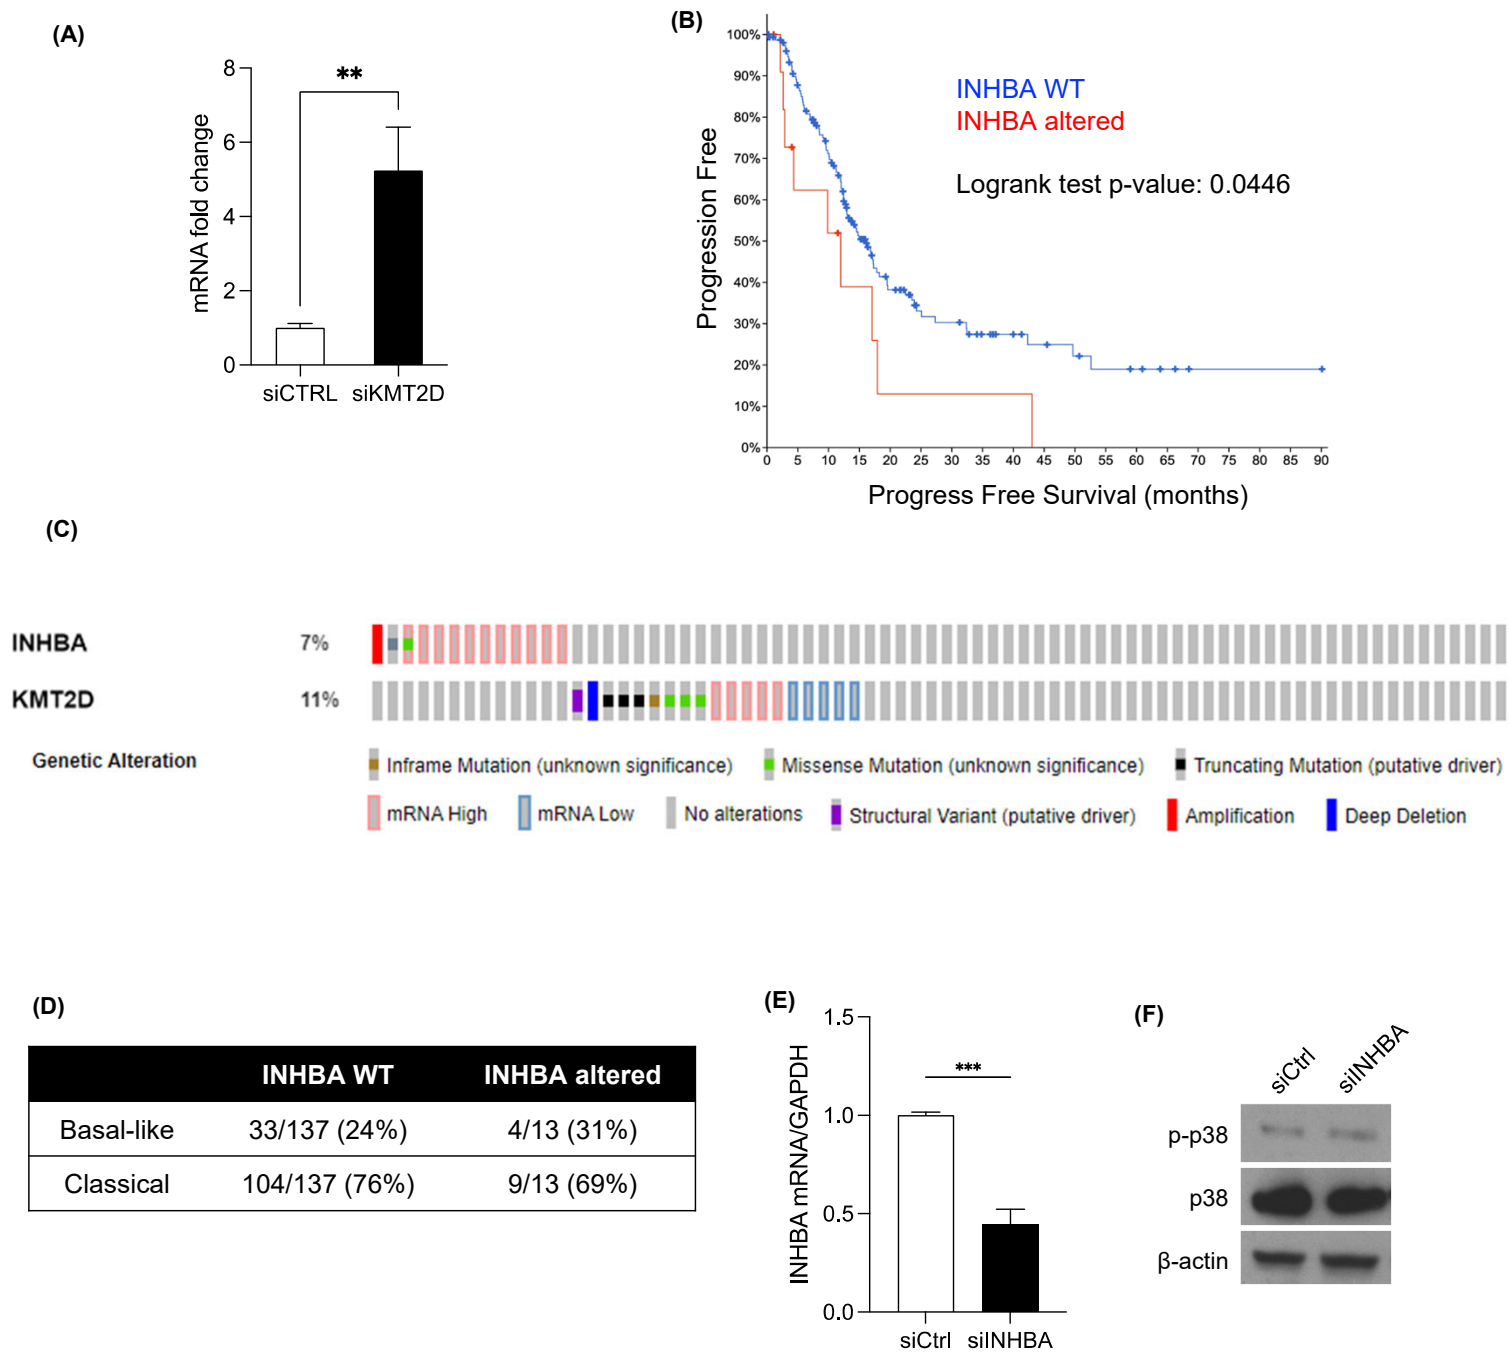

**Supplementary Fig. 4** KMT2D depletion induces activin A expression. **(A)** *INHBA* mRNA expression quantified by RT-qPCR in HPDE cells transfected with siKMT2D or siCTRL. (\*\* $p < 0.01$ , unpaired student t test,  $n = 3$ ) **(B)** Kaplan-Meier curve of progression-free survival in PDAC patients with or without *INHBA* alterations ( $n = 168$ , TCGA database). **(C)** Genetic and transcriptional alterations of *INHBA* and *KMT2D* in human PDAC tissues ( $n = 168$ , TCGA database). **(D)** Percentage of basal-like and classical PDAC subtypes in *INHBA* WT and altered tumors. **(E)** Real-time RT-PCR of *INHBA* in control (siCtrl) or *INHBA* knockdown (siINHBA) transfected BxPC-3 WT cells. GAPDH was used as the reference gene (\*\* $p < 0.0005$ , unpaired student t-test,  $n = 3$ ). **(F)** Western blot of p-p38 and p38 in WT BxPC-3 cells transfected with siCtrl or siINHBA for 24 hours.  $\beta$ -actin was used as loading control.



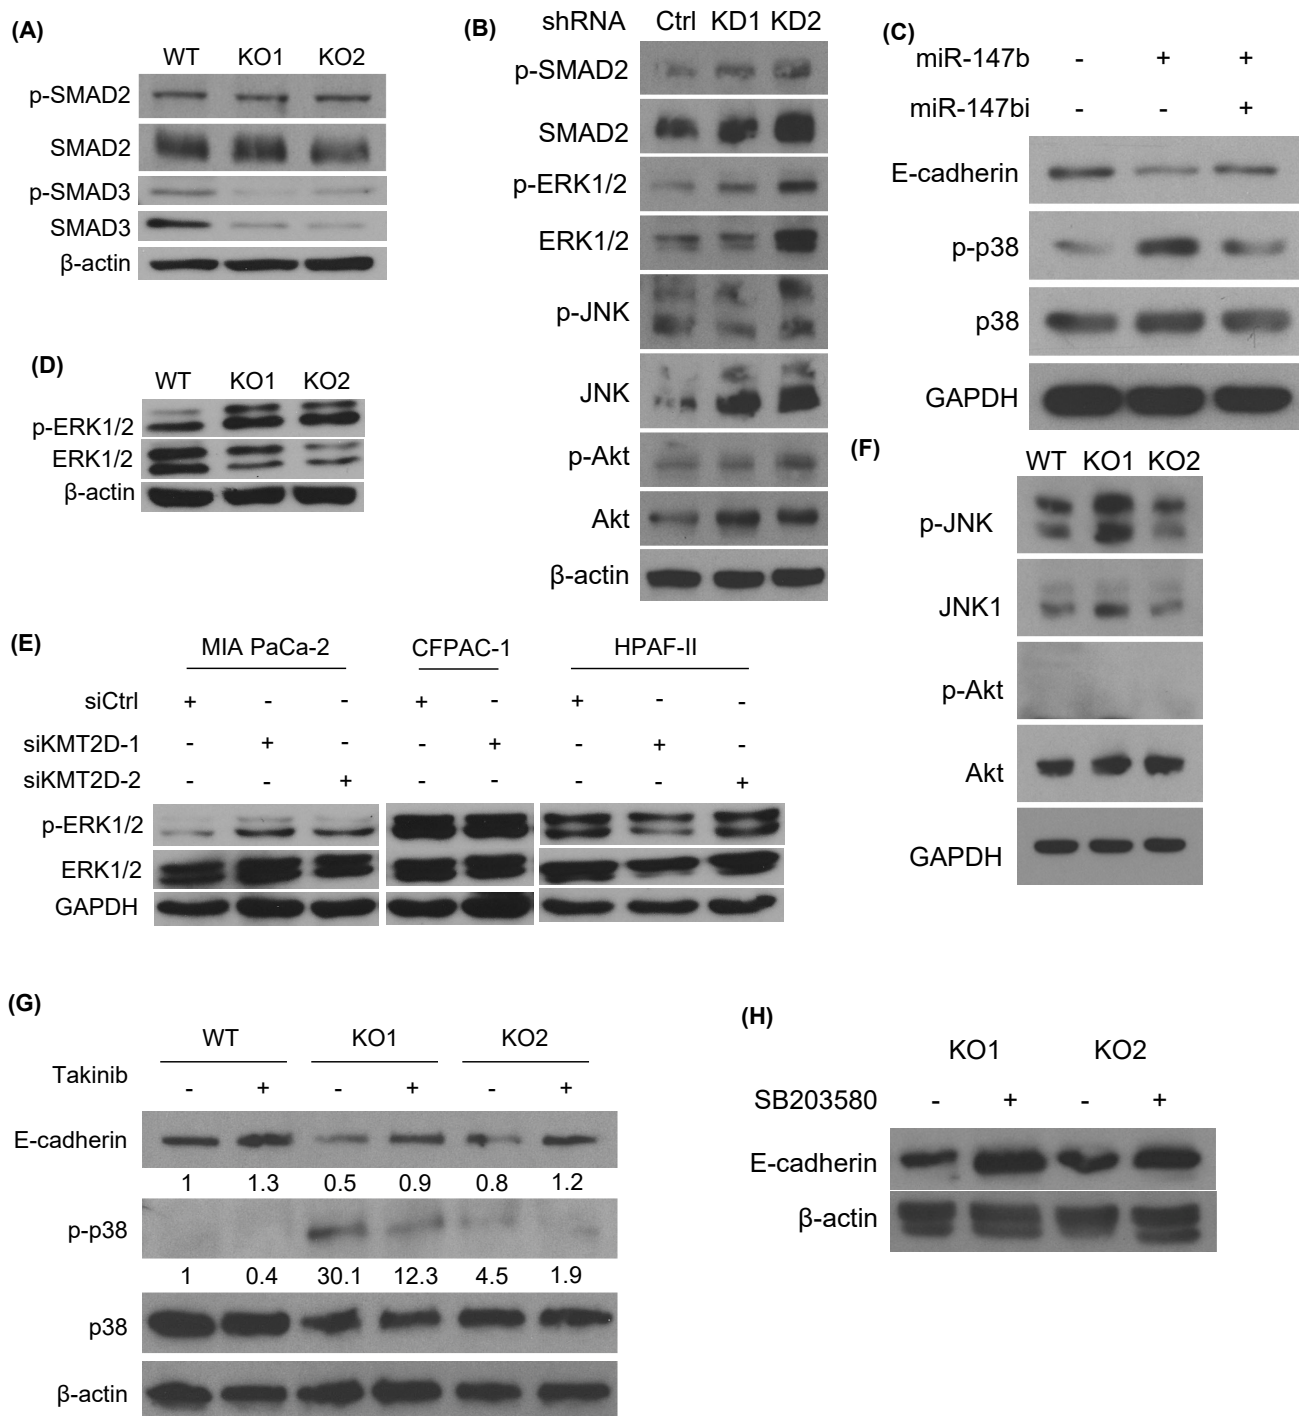

**Supplementary Fig. 5** miR-147b induced KMT2D loss activates a non-canonical activin A pathway. **(A)** Western blot analysis of p-SMAD2, SMAD2, p-SMAD3, and SMAD3 in KMT2D WT and KO BxPC-3 cells. Same β-actin loading control was shown as in Fig. 5f. **(B)** Western blot analysis of p-SMAD2, SMAD2, p-ERK1/2, ERK1/2, p-JNK, JNK, p-Akt, and Akt in WT and KMT2D-KD PANC-1 cells. β-actin was used as loading control. **(C)** Western blot of E-cadherin, p-p38, and p38 in PANC-1 cells transfected with miR-147b mimic with or without miR-147bi. GAPDH was used as loading control. **(D)** Western blot analysis of ERK1/2 and p-ERK1/2 in WT and KMT2D-KO BxPC-3 cells. β-actin was used as loading control. **(E)** Western blot analysis of ERK1/2 and p-ERK1/2 in PDAC cells transfected with siCtrl or siKMT2D. Same GAPDH loading control for MIA PaCa-2 and HPAF-II was shown as in Fig. 5g. **(F)** Western blot analysis of p-JNK, JNK, p-Akt, and Akt in WT and KMT2D-KO BxPC-3 cells. GAPDH was used as loading control. **(G)** Western blot of E-cadherin, p-p38, and p38 in KMT2D-KO BxPC-3 cells treated with either control or TAK1 inhibitor, Takinib, or DMSO for 72 hours. β-actin was used as loading control. Band quantification for E-cadherin/β-actin and p-p38/p38 are listed. Quantification was normalized to WT DMSO. **(H)** Western blot of E-cadherin in KMT2D-KO BxPC-3 cells after 96 hours treatment with SB203580. β-actin was used as loading control.

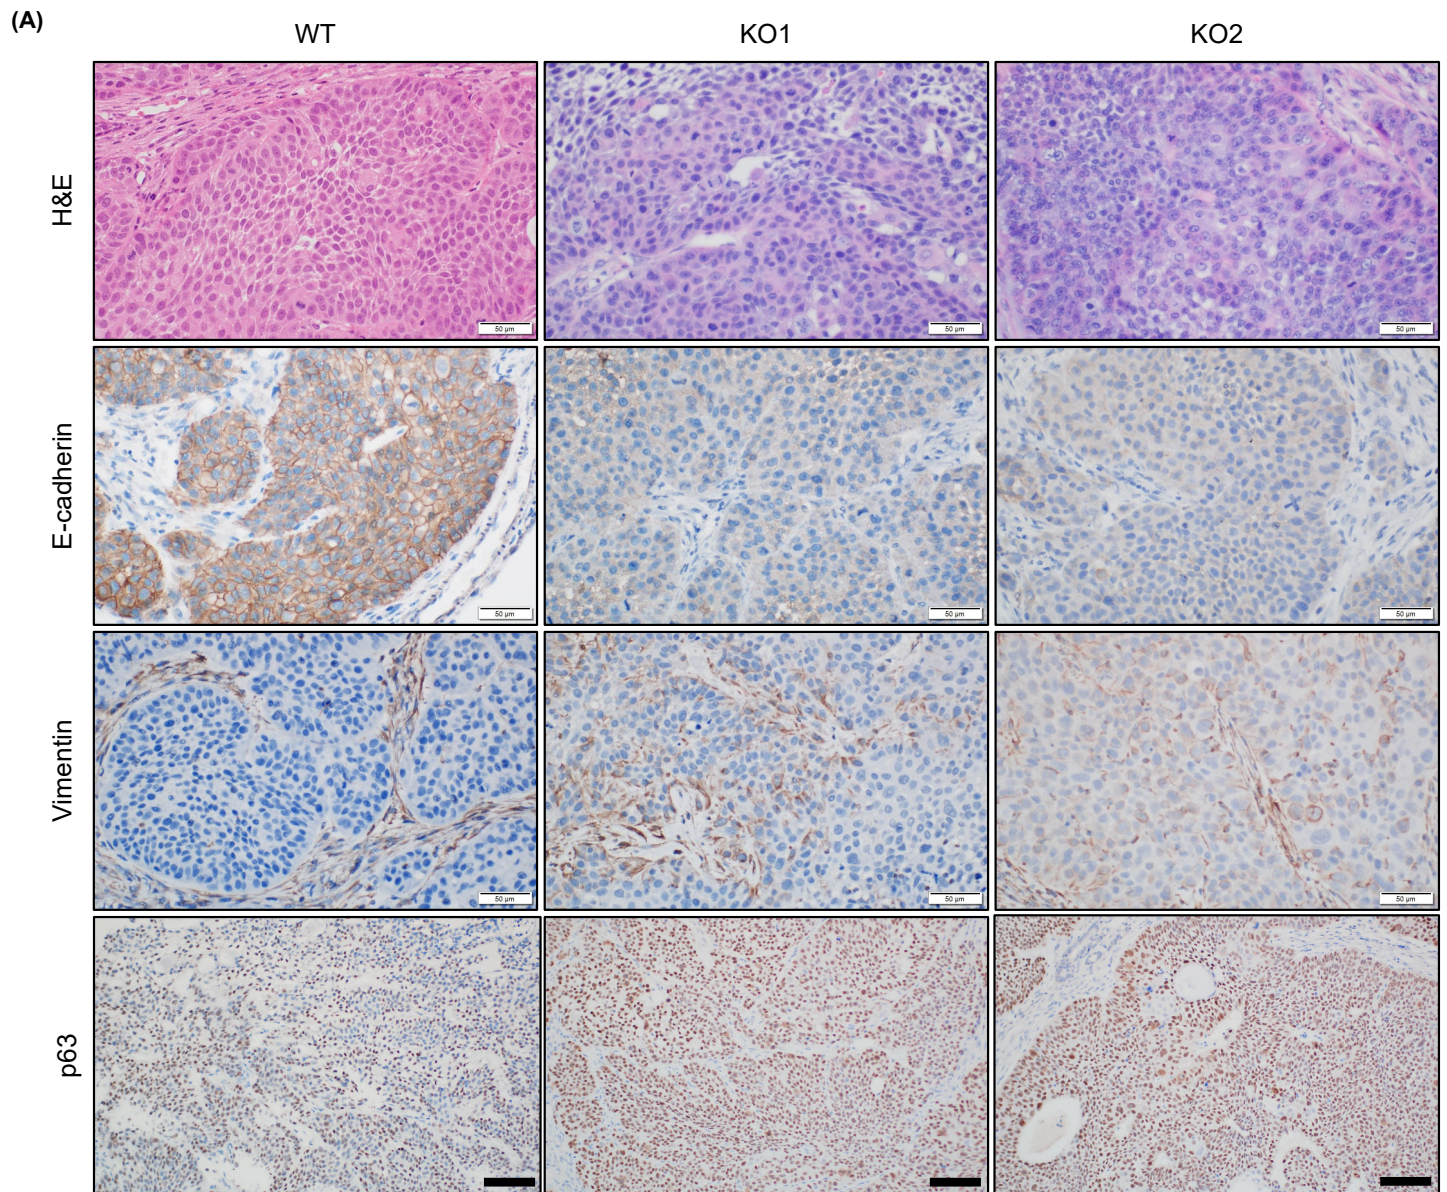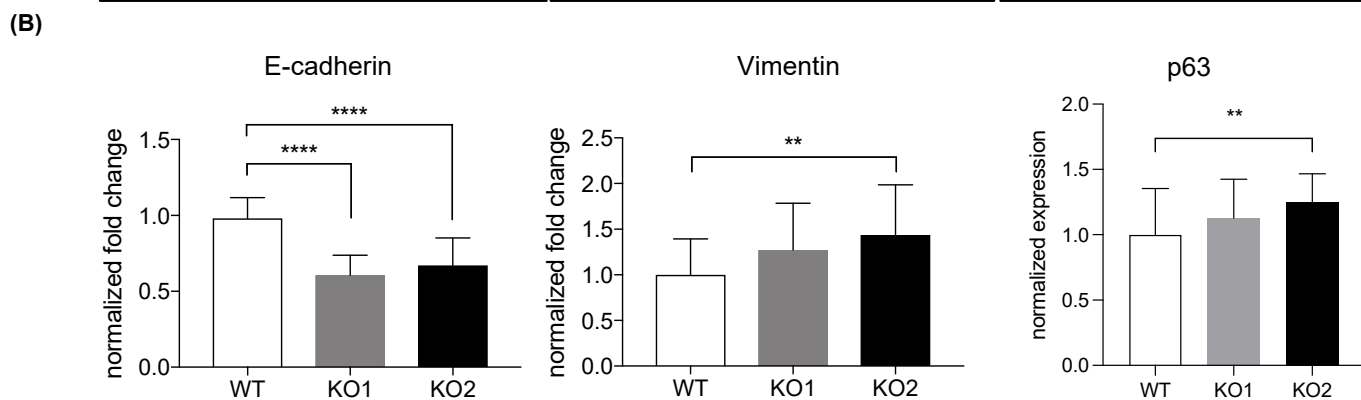

**Supplementary Fig. 6** KMT2D knockout PDAC cells form tumors with enhanced mesenchymal differentiation in vivo. **(A)** Representative H&E and immunohistochemical stains of E-cadherin, Vimentin, and p63 in BxPC-3 WT and KMT2D-KO orthotopic xenograft tumors. (scale bar = 50  $\mu$ m, p63 scale bar = 100  $\mu$ m) **(B)** Quantification of immunohistochemistry stains of E-cadherin, Vimentin, and p63 in WT and KMT2D KO xenograft tumors shown in **a** (\*\* $p < 0.01$ , \*\*\*\* $p < 0.001$ , One-way ANOVA test with Tukey's multiple comparisons,  $n = 10$ )



## Supplementary References:

1. Paulsen, M.T., Veloso, A., Prasad, J., Bedi, K., Ljungman, E.A., Magnuson, B., Wilson, T.E. & Ljungman, M. Use of Bru-Seq and BruChase-Seq for genome-wide assessment of the synthesis and stability of RNA. *Methods*. 2014; **67**(1): 45-54.
2. Bedi, K., Magnuson, B.R., Narayanan, I., Paulsen, M., Wilson, T.E. & Ljungman, M. Co-transcriptional splicing efficiencies differ within genes and between cell types. *RNA*. 2021.
3. Paulsen, M.T., Veloso, A., Prasad, J., Bedi, K., Ljungman, E.A., Tsan, Y.C., Chang, C.W., Tarrier, B., Washburn, J.G., Lyons, R., Robinson, D.R., Kumar-Sinha, C., Wilson, T.E. & Ljungman, M. Coordinated regulation of synthesis and stability of RNA during the acute TNF-induced proinflammatory response. *Proc Natl Acad Sci U S A*. 2013; **110**(6): 2240-2245.
4. Langmead, B. & Salzberg, S.L. Fast gapped-read alignment with Bowtie 2. *Nat Methods*. 2012; **9**(4): 357-359.
5. Dobin, A., Davis, C.A., Schlesinger, F., Drenkow, J., Zaleski, C., Jha, S., Batut, P., Chaisson, M. & Gingeras, T.R. STAR: ultrafast universal RNA-seq aligner. *Bioinformatics*. 2013; **29**(1): 15-21.
6. Frankish, A., Diekhans, M., Ferreira, A.M., Johnson, R., Jungreis, I., Loveland, J., Mudge, J.M., Sisu, C., Wright, J., Armstrong, J., Barnes, I., Berry, A., Bignell, A., Carbonell Sala, S., Chrast, J., Cunningham, F., Di Domenico, T., Donaldson, S., Fiddes, I.T., Garcia Giron, C., Gonzalez, J.M., Grego, T., Hardy, M., Hourlier, T., Hunt, T., Izuogu, O.G., Lagarde, J., Martin, F.J., Martinez, L., Mohanan, S., Muir, P., Navarro, F.C.P., Parker, A., Pei, B., Pozo, F., Ruffier, M., Schmitt, B.M., Stapleton, E., Suner, M.M., Sycheva, I., Uszczyńska-Ratajczak, B., Xu, J., Yates, A., Zerbino, D., Zhang, Y., Aken, B., Choudhary, J.S., Gerstein, M., Guigo, R., Hubbard, T.J.P., Kellis, M., Paten, B., Reymond, A., Tress, M.L. & Flicek, P. GENCODE reference annotation for the human and mouse genomes. *Nucleic Acids Res*. 2019; **47**(D1): D766-D773.
